# Supplementary material
Source: Springer Nature journal article supplement (https://www.springermedizin.de/resource/supplementary/12889_2010_3461_MOESM2_ESM.pdf/9488936)

## (a) Anxiety

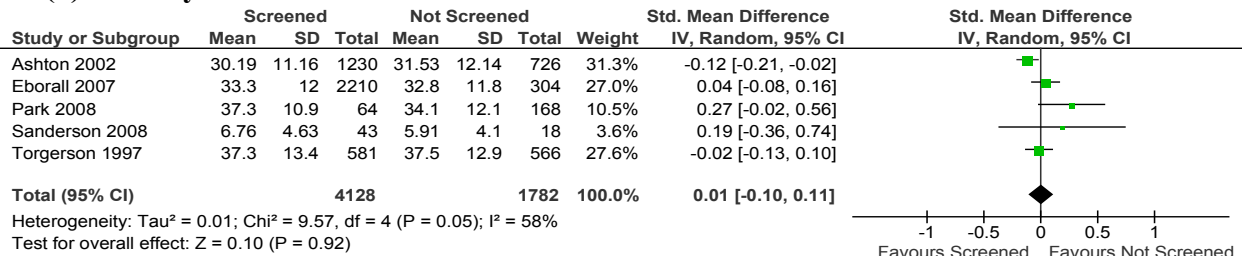

## (b) Depression

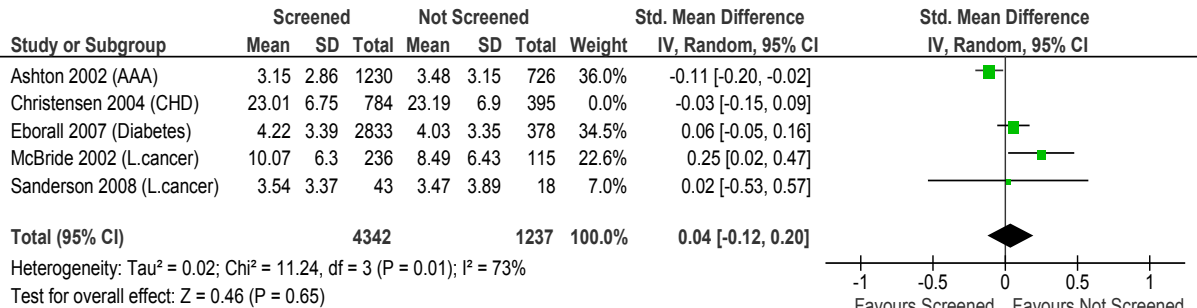

## (c) Mental QoL

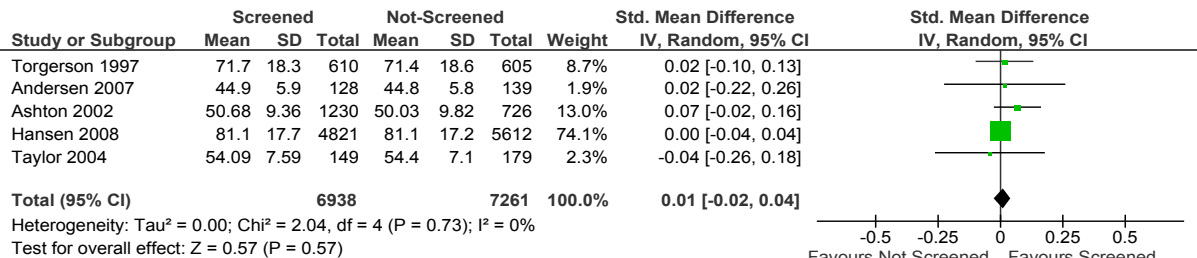

## (d) Self Assessed Health

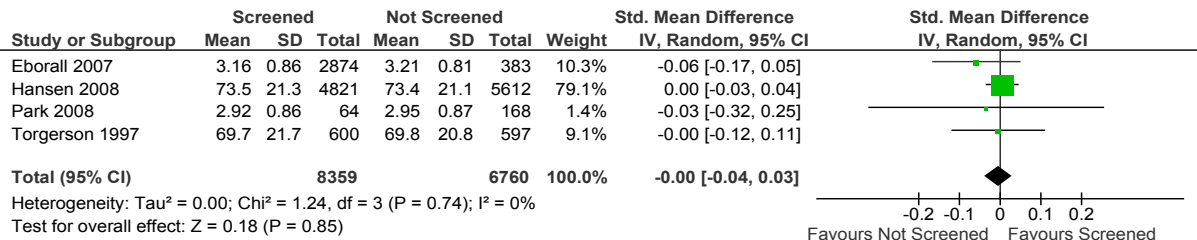

Supplement: MOESM2 [file 9488936]
